# Supplementary material for: Analysis of Plant-Bacteria Interactions in Their Native Habitat: Bacterial Communities Associated with Wild Tobacco Are Independent of Endogenous Jasmonic Acid Levels and Developmental Stages
Source: PubMed Central journal article supplement (PMC3984252; doi:10.1371/journal.pone.0094710), 2014-04-11
Supplement: pone.0094710.s006.pdf [file pone.0094710.s006.pdf]

Table S1. Average rosette diameter and stalk length of native field grown *N. attenuata* at the time of harvest.

| Stages                 | Rosette diameter (cm) |       | Stalk length (cm) |       |
|------------------------|-----------------------|-------|-------------------|-------|
|                        | EV                    | irAOC | EV                | irAOC |
| Rosette (1)            | 9.3                   | 9.5   | 0                 | 0     |
| Elongated I (2)        | 13                    | 17    | 5                 | 8     |
| Elongated I & II (3)   | 15                    | 18    | 14                | 25    |
| Elongated II & III (4) | 28                    | 31    | 21                | 36    |
| Flowering I & II (5)   | 38                    | 40    | 40                | 54    |

N=3-5.

Table S2. Cultured putative specialist and generalist bacterial isolates used in this study.

| Isolates | Nearest type strains                                                       | Characteristics                  | CFU<br>(OD600=1)      | References              |
|----------|----------------------------------------------------------------------------|----------------------------------|-----------------------|-------------------------|
| A21      | <i>Pseudomonas koreensis</i> Ps 9-14 <sup>T</sup><br>(AF468452)            | Specialist for EV                | 28 X 10 <sup>-7</sup> | This study              |
| B31      | <i>Pseudomonas libanensis</i> CCUG<br>43190 <sup>T</sup> (AF057645)        | Specialist for EV                | 40 X 10 <sup>-7</sup> | This study              |
| A250     | <i>Methylobacterium radiotolerans</i><br>CBMB20 <sup>T</sup> (AY683045)    | Specialist for EV                | 24X 10 <sup>-5</sup>  | This study              |
| A176     | <i>Pseudomonas frederiksbergensis</i><br>JAJ28 <sup>T</sup> (AJ249382)     | Specialist for EV                | 12 X10 <sup>-7</sup>  | This study              |
| CN4      | <i>Rhizobium soli</i> KCTC 12873 <sup>T</sup><br>(EF363715)                | Specialist for EV                | 12 X 10 <sup>-6</sup> | This study              |
| E11      | <i>Azospirillum lipoferum</i> ATCC 29707 <sup>T</sup><br>(Z29619)          | Specialist irAOC                 | 40 x10 <sup>-5</sup>  | This study              |
| AN3      | <i>Rhizobium massiliae</i> KCTC 12121 <sup>T</sup><br>(AY341343)           | Specialist irAOC                 | 40 X 10 <sup>-4</sup> | This study              |
| B56      | <i>Kocuria palustris</i> DSM 11925 <sup>T</sup><br>(Y16263)                | Specialist irAOC                 | 11 X 10 <sup>-6</sup> | This study              |
| D102     | <i>Kocuria marina</i> KMM 3905 <sup>T</sup><br>(AY211385)                  | Specialist irAOC                 | 13 X 10 <sup>-6</sup> | This study              |
| A70      | <i>Pseudomonas azotoformans</i> CCUG<br>12536 <sup>T</sup> (D84009)        | Specialist irAOC                 | 43 X 10 <sup>-7</sup> | This study              |
| D67      | <i>Arthrobacter ureafaciens</i> ATCC 7562 <sup>T</sup><br>(X80744)         | Generalist for both<br>genotypes | 12 X 10 <sup>-7</sup> | This study              |
| B47      | <i>Acinetobacter calcoaceticus</i> ATCC<br>23055 <sup>T</sup> (AJ888983)   | Generalist for both<br>genotypes | 70 X 10 <sup>-7</sup> | This study              |
| CN2      | <i>Bacillus cereus</i> ATCC 14579 <sup>T</sup><br>(AE016877)               | Generalist for both<br>genotypes | 17 X 10 <sup>-7</sup> | This study              |
| AN6      | <i>Rhizobium phenanthrenilyticum</i> DSM<br>21882 <sup>T</sup> (FJ743436)  | Generalist for both<br>genotypes | 80 X 10 <sup>-4</sup> | This study              |
| A170     | <i>Pseudomonas brassicacearum</i> DSM<br>13227 <sup>T</sup> (AF100321)     | Generalist for both<br>genotypes | 90 X 10 <sup>-7</sup> | This study              |
| K1       | <i>Bacillus mojavensis</i> ATCC 51516 <sup>T</sup><br>(AB021191)           | Generalist for both<br>genotypes | 30 X 10 <sup>-7</sup> | This study              |
| E46      | <i>Arthrobacter nitroguajacolicus</i> DSM<br>15232 <sup>T</sup> (AJ512504) | Generalist for both<br>genotypes | 16 X 10 <sup>-7</sup> | This study              |
| B55      | <i>Bacillus megaterium</i> ATCC 14581 <sup>T</sup><br>(D16273)             | Generalist for both<br>genotypes | 20 X 10 <sup>-5</sup> | Meldau et al.,<br>2012. |

OD, optical density at 600nm; CFU, colony forming units.

Table S4. Uni-Frac beta diversity is not significantly different among developmental stages of EV and irAOC genotypes tissues indicating that bacterial communities are independent of developmental stages.

| Samples | 1EVL | 2EVL | 3EVL | 4EVL | 5EVL | 1irAOCL | 2irAOCL | 3irAOCL | 4irAOCL | 5irAOCL | 1EVR | 2EVR | 3EVR | 4EVR | 5EVR | 1irAOCR | 2irAOCR | 3irAOCR | 4irAOCR | 5irAOCR |     |   |
|---------|------|------|------|------|------|---------|---------|---------|---------|---------|------|------|------|------|------|---------|---------|---------|---------|---------|-----|---|
| 1EVL    | -    | n.s  | n.s  | n.s  | n.s  | n.s     | n.s     | n.s     | n.s     | n.s     | n.s  | n.s  | n.s  | n.s  | n.s  | n.s     | n.s     | n.s     | *       | *       |     |   |
| 2EVL    |      | -    | n.s  | n.s  | n.s  | n.s     | n.s     | n.s     | n.s     | n.s     | n.s  | *    | n.s  | n.s  | n.s  | n.s     | n.s     | n.s     | n.s     | n.s     |     |   |
| 3EVL    |      |      | -    | n.s  | n.s  | n.s     | n.s     | n.s     | n.s     | n.s     | n.s  | n.s  | n.s  | n.s  | n.s  | n.s     | n.s     | n.s     | n.s     | n.s     |     |   |
| 4EVL    |      |      |      | -    | n.s  | n.s     | n.s     | n.s     | n.s     | n.s     | n.s  | n.s  | n.s  | n.s  | n.s  | n.s     | n.s     | n.s     | n.s     | *       | *   |   |
| 5EVL    |      |      |      |      | -    | n.s     | n.s     | n.s     | n.s     | n.s     | n.s  | n.s  | n.s  | n.s  | n.s  | n.s     | n.s     | n.s     | n.s     | n.s     | n.s |   |
| 1irAOCL |      |      |      |      |      | -       | n.s     | n.s     | n.s     | n.s     | n.s  | n.s  | n.s  | n.s  | n.s  | n.s     | n.s     | *       | *       | n.s     |     |   |
| 2irAOCL |      |      |      |      |      |         | -       | n.s     | n.s     | n.s     | n.s  | n.s  | n.s  | n.s  | n.s  | n.s     | n.s     | n.s     | n.s     | n.s     | n.s |   |
| 3irAOCL |      |      |      |      |      |         |         | -       | n.s     | n.s     | n.s  | n.s  | n.s  | n.s  | n.s  | n.s     | n.s     | n.s     | n.s     | n.s     | n.s |   |
| 4irAOCL |      |      |      |      |      |         |         |         | -       | n.s     | n.s  | n.s  | n.s  | n.s  | n.s  | n.s     | n.s     | n.s     | n.s     | n.s     | n.s |   |
| 5irAOCL |      |      |      |      |      |         |         |         |         | -       | n.s  | n.s  | n.s  | n.s  | n.s  | n.s     | n.s     | n.s     | n.s     | n.s     | n.s |   |
| 1EVR    |      |      |      |      |      |         |         |         |         |         | -    | n.s  | n.s  | n.s  | n.s  | n.s     | n.s     | n.s     | n.s     | n.s     | n.s |   |
| 2EVR    |      |      |      |      |      |         |         |         |         |         |      | -    | n.s  | n.s  | n.s  | n.s     | n.s     | n.s     | n.s     | n.s     | n.s |   |
| 3EVR    |      |      |      |      |      |         |         |         |         |         |      |      | -    | n.s  | n.s  | n.s     | n.s     | n.s     | n.s     | n.s     | n.s |   |
| 4EVR    |      |      |      |      |      |         |         |         |         |         |      |      |      | -    | n.s  | n.s     | n.s     | n.s     | n.s     | n.s     | n.s |   |
| 5EVR    |      |      |      |      |      |         |         |         |         |         |      |      |      |      | -    | n.s     | n.s     | n.s     | n.s     | n.s     | n.s |   |
| 1irAOCR |      |      |      |      |      |         |         |         |         |         |      |      |      |      |      | -       | n.s     | n.s     | n.s     | n.s     | n.s |   |
| 2irAOCR |      |      |      |      |      |         |         |         |         |         |      |      |      |      |      |         | -       | n.s     | n.s     | n.s     | n.s |   |
| 3irAOCR |      |      |      |      |      |         |         |         |         |         |      |      |      |      |      |         |         | -       | n.s     | n.s     | n.s |   |
| 4irAOCR |      |      |      |      |      |         |         |         |         |         |      |      |      |      |      |         |         |         |         | -       | n.s |   |
| 5irAOCR |      |      |      |      |      |         |         |         |         |         |      |      |      |      |      |         |         |         |         |         |     | - |

N= 6374 sequences for each samples, R, roots; L, leaves; \* (0.01-0.05) marginally significant; n.s (> 0.1) not significant.

Table S5. Pairwise ANOSIM did not differ significantly among rosette (young) and elongated, flowering (old) developmental stages.

| Pairwise Tests              |                |                       |
|-----------------------------|----------------|-----------------------|
| Groups                      | R<br>Statistic | Significance<br>Level |
| EVR-young, EVR-old          | 0.917          | 0.1                   |
| EVR-young, irAOOCR-young    | 0              | 1                     |
| EVR-young, irAOOCR-old      | 1              | 0.1                   |
| EVR-young, EVL-young        | 0              | 0.667                 |
| EVR-young, EVL-old          | 1              | 0.1                   |
| EVR-young, irAOCL-young     | 1              | 0.333                 |
| EVR-young, irAOCL-old       | 1              | 0.1                   |
| EVR-old, irAOOCR-young      | 1              | 0.1                   |
| EVR-old, irAOOCR-old        | 0.704          | 0.1                   |
| EVR-old, EVL-young          | 0.5            | 0.1                   |
| EVR-old, EVL-old            | 0.852          | 0.1                   |
| EVR-old, irAOCL-young       | 1              | 0.1                   |
| EVR-old, irAOCL-old         | 0.963          | 0.1                   |
| irAOOCR-young, irAOOCR-old  | 1              | 0.1                   |
| irAOOCR-young, EVL-young    | 0.5            | 0.333                 |
| irAOOCR-young, EVL-old      | 1              | 0.1                   |
| irAOOCR-young, irAOCL-young | 1              | 0.333                 |
| irAOOCR-young, irAOCL-old   | 1              | 0.1                   |
| irAOOCR-old, EVL-young      | 0.417          | 0.1                   |
| irAOOCR-old, EVL-old        | 0.926          | 0.1                   |
| irAOOCR-old, irAOCL-young   | 0.833          | 0.1                   |
| irAOOCR-old, irAOCL-old     | 0.852          | 0.1                   |
| EVL-young, EVL-old          | 0.083          | 0.4                   |
| EVL-young, irAOCL-young     | 0              | 1                     |
| EVL-young, irAOCL-old       | 0.083          | 0.4                   |
| EVL-old, irAOCL-young       | -0.333         | 0.9                   |
| EVL-old, irAOCL-old         | -0.148         | 0.9                   |
| irAOCL-young, irAOCL-old    | -0.5           | 1                     |
| Global                      | 0.619          | 0.001                 |

Table S6. List of OTUs significantly different among EV and irAOC leaves and roots at genera (or higher) level retrieved by pyrosequencing.

| OTU numbers | Genus (or higher)        | Leaves                    |                           | Roots                     |                           | ANOVA test                                                    |        |
|-------------|--------------------------|---------------------------|---------------------------|---------------------------|---------------------------|---------------------------------------------------------------|--------|
|             |                          | EVL                       | irAOC <sub>L</sub>        | EVR                       | irAOC <sub>R</sub>        | Communities (EVL*irAOC <sub>L</sub> *EVR*irAOC <sub>R</sub> ) |        |
|             |                          | Average proportion %      |                           |                           |                           | F <sub>3,16</sub>                                             | p      |
| Otu51       | <i>Arthrobacter</i>      | 0 <sup>A</sup>            | 0 <sup>A</sup>            | 0.12 <sup>B</sup> (0.04)  | 0.15 <sup>B</sup> (0.06)  | 3.67                                                          | 0.03   |
| Otu92       | <i>Phenylobacterium</i>  | 0 <sup>A</sup>            | 0 <sup>A</sup>            | 0.04 <sup>B</sup> (0.01)  | 0.04 <sup>B</sup> (0.01)  | 5.56                                                          | 0.008  |
| Otu123      | <i>Nocardioides</i>      | 0 <sup>A</sup>            | 0 <sup>A</sup>            | 0.03 <sup>B</sup> (0.01)  | 0.04 <sup>B</sup> (0.01)  | 7.48                                                          | 0.01   |
| Otu27       | <i>Rhizobium</i>         | 0 <sup>A</sup>            | 0 <sup>A</sup>            | 0.56 <sup>B</sup> (0.16)  | 0.39 <sup>B</sup> (0.2)   | 5.15                                                          | 0.01   |
| Otu60       | <i>Cupriavidus</i>       | 0.01 <sup>A</sup> (0.009) | 0.01 <sup>A</sup> (0.004) | 0.09 <sup>B</sup> (0.01)  | 0.11 <sup>B</sup> (0.03)  | 7.24                                                          | 0.0028 |
| Otu63       | <i>Enterobacter</i>      | 10.1 <sup>C</sup> (3)     | 7.2 <sup>BC</sup> (2.4)   | 2.65 <sup>AB</sup> (0.9)  | 0.9 <sup>A</sup> (0.3)    | 4.19                                                          | 0.02   |
| Otu28       | <i>Methylophilaceae</i>  | 0.03 <sup>A</sup> (0.03)  | 0.03 <sup>A</sup> (0.03)  | 0.44 <sup>B</sup> (0.17)  | 0.71 <sup>B</sup> (0.2)   | 6.28                                                          | 0.005  |
| Otu285      | <i>Pseudomonas</i>       | 0.03 <sup>A</sup> (0.01)  | 0.02 <sup>A</sup> (0.008) | 0.15 <sup>B</sup> (0.05)  | 0.08 <sup>AB</sup> (0.01) | 3.85                                                          | 0.03   |
| Otu56       | <i>Agrobacterium</i>     | 0.05 <sup>A</sup> (0.03)  | 0.03 <sup>A</sup> (0.03)  | 0.14 <sup>B</sup> (0.04)  | 0.06 <sup>AB</sup> (0.02) | 3.52                                                          | 0.03   |
| Otu0        | <i>Serratia</i>          | 28 <sup>B</sup> (4)       | 14.23 <sup>A</sup> (4.3)  | 8.53 <sup>A</sup> (3)     | 6.86 <sup>A</sup> (2.1)   | 7.67                                                          | 0.002  |
| Otu13       | <i>Mycoplana</i>         | 0.02 <sup>A</sup> (0.01)  | 0.02 <sup>A</sup> (0.02)  | 1.68 <sup>B</sup> (0.4)   | 1.8 <sup>B</sup> (0.8)    | 4.43                                                          | 0.01   |
| Otu24       | <i>Achromobacter</i>     | 0.14 <sup>A</sup> (0.08)  | 0.01 <sup>A</sup> (0.01)  | 0.48 <sup>AB</sup> (0.16) | 0.68 <sup>B</sup> (0.2)   | 3.64                                                          | 0.03   |
| Otu3        | <i>Oxalobacteraceae</i>  | 1.69 <sup>AB</sup> (1.1)  | 0.34 <sup>A</sup> (0.1)   | 4.38 <sup>BC</sup> (0.9)  | 5.8 <sup>C</sup> (1.2)    | 6.58                                                          | 0.005  |
| Otu398      | <i>Janthinobacterium</i> | 0.01 <sup>A</sup> (0.004) | 0.01 <sup>A</sup> (0.006) | 0.26 <sup>B</sup> (0.05)  | 0.16 <sup>B</sup> (0.07)  | 7.08                                                          | 0.003  |

R, roots; L, leaves; different letters indicates significant differences with Fisher's PLSD test;  $P < 0.05$ .
